# Supplementary material for: Provision of Digital Health Technologies for Opioid Use Disorder Treatment by US Health Care Organizations
Source: PubMed Central journal article supplement (PMC10352858; doi:10.1001/jamanetworkopen.2023.23741), 2023-07-17
Supplement: jamanetwopen-e2323741-s001.pdf [file jamanetwopen-e2323741-s001.pdf]

## Supplemental Online Content

Miller-Rosales C, Morden NE, Brunette MF, Busch SH, Torous JB, Meara ER. Provision of digital health technologies for opioid use disorder treatment by US health care organizations. *JAMA Netw Open*. 2023;6(7):e2323741.  
doi:10.1001/jamanetworkopen.2023.23741

**eFigure.** Flowchart of the 2022 National Survey of Accountable Care Organizations

**eTable 1.** Survey Questions for Variables Included in the Study Analysis

**eTable 2.** Comparisons Between Characteristics of Respondents to the National Survey of Accountable Care Organizations and Nonrespondent Organizations in the Medicare Shared Savings Program

**eTable 3.** The Association Between Substance Use Disorder Treatment Resources and Adoption of Digital Health Technologies for Opioid Use Disorder in Accountable Care Organizations

This supplemental material has been provided by the authors to give readers additional information about their work.

**eFigure.** Flowchart of the 2022 National Survey of Accountable Care Organizations

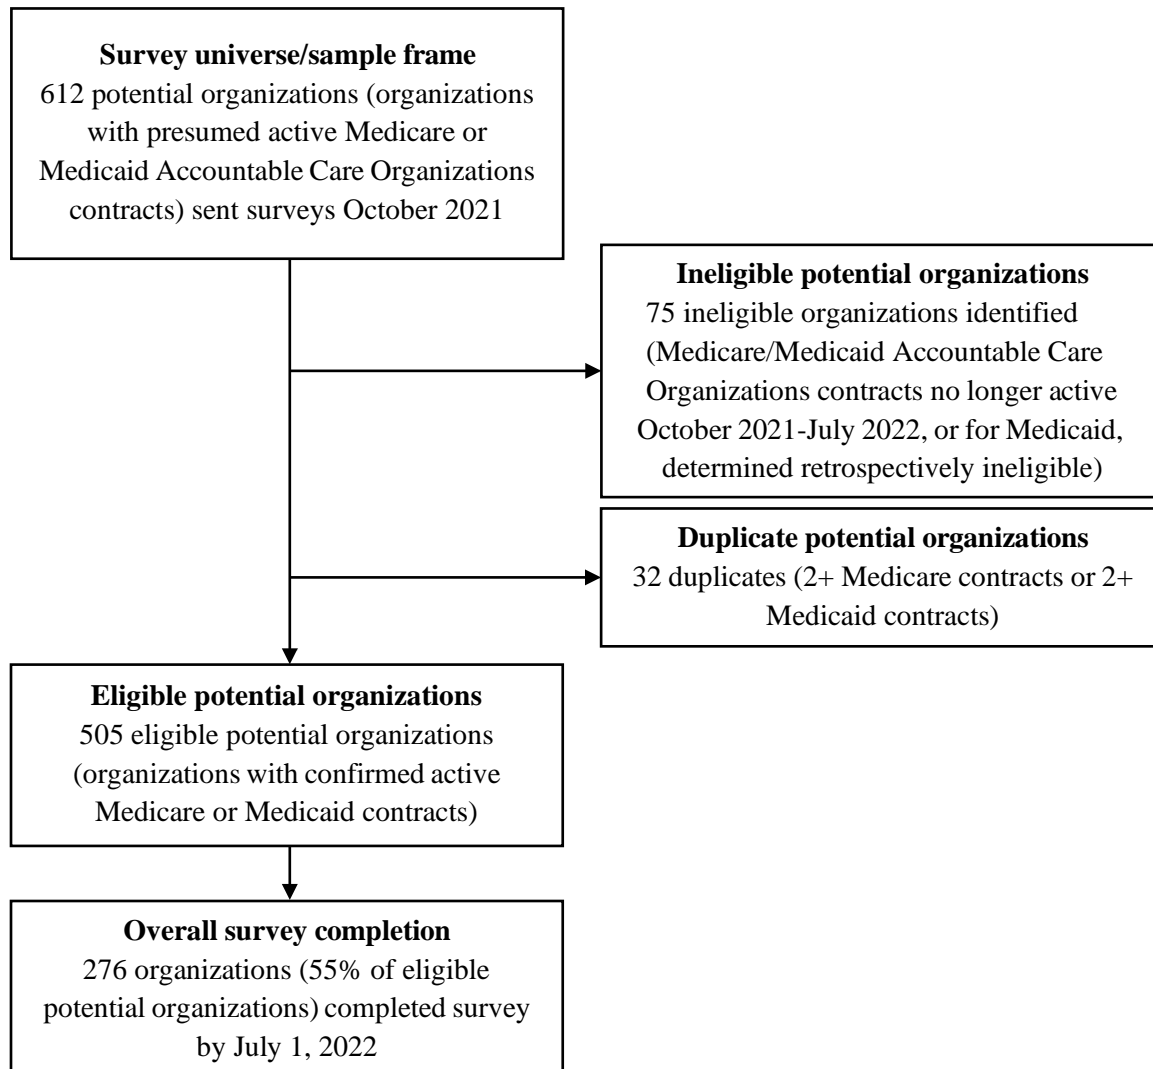

**eTable 1.** Survey Questions for Variables Included in the Study Analysis

| Variable                                                                    | Survey wording                                                                                                                                                                                                                                                                                                                                                                  | Responses                                                                                                                       |
|-----------------------------------------------------------------------------|---------------------------------------------------------------------------------------------------------------------------------------------------------------------------------------------------------------------------------------------------------------------------------------------------------------------------------------------------------------------------------|---------------------------------------------------------------------------------------------------------------------------------|
| <b>Outcomes</b>                                                             |                                                                                                                                                                                                                                                                                                                                                                                 |                                                                                                                                 |
| Remote mental health therapy and tracking                                   | <p>Which of the following strategies, if any, do clinicians in your organization use to integrate treatment for OUD and mental illness? If provided directly and via referral, check both.</p> <p>Digital therapy or other resources to track mental health symptoms and promote OUD self-management (e.g., BetterHelp or similar digital tools for smartphone or computer)</p> | <p>Yes, provide directly</p> <p>Yes, refer out</p> <p>No</p>                                                                    |
| Virtual peer recovery support programs                                      | <p>Do clinicians in your organization delivering services to patients with opioid use disorder provide any of the following services, either directly or via referral?</p> <p>Virtual recovery programs (e.g., SMART Recovery or other virtual peer recovery groups accessed via mobile device or computer)</p>                                                                 | <p>Yes</p> <p>No</p>                                                                                                            |
| Digital recovery support for adjuvant cognitive behavioral therapy          | <p>Do clinicians in your organization delivering services to patients with opioid use disorder provide any of the following services, either directly or via referral?</p> <p>Digital recovery support services (e.g., reSET-O or similar prescription digital therapeutic intended to provide adjuvant cognitive behavioral therapy)</p>                                       | <p>Yes</p> <p>No</p>                                                                                                            |
| <b>Substance use disorder treatment capabilities</b>                        |                                                                                                                                                                                                                                                                                                                                                                                 |                                                                                                                                 |
| Addiction medicine specialist                                               | <p>Does your organization include the following addiction treatment specialists?</p> <p>Board-certified addiction psychiatry or addiction medicine specialist (i.e., psychiatrist or other physician certified to provide addiction treatment)</p>                                                                                                                              | <p>Yes</p> <p>No</p>                                                                                                            |
| Sufficient staff to treat the needs of patients with substance use disorder | <p>How strongly do you agree or disagree with this statement: <i>Our organization has sufficient staff to treat the needs of our patients with substance use disorder.</i></p>                                                                                                                                                                                                  | <p>Strongly agree</p> <p>Somewhat agree</p> <p>Neither agree nor disagree</p> <p>Somewhat disagree</p> <p>Strongly disagree</p> |
| Medications for opioid use disorder                                         | <p>Do clinicians in your organization offer patients buprenorphine (i.e., Subutex, Suboxone) for OUD?</p> <p>Do clinicians in your organization offer patients methadone for OUD?</p> <p>Do clinicians in your organization offer patients naltrexone (i.e., Revia, Vivitrol) for OUD?</p>                                                                                      | <p>Yes</p> <p>No</p>                                                                                                            |

|                                                                |                                                                                                                                                                                                                                                                                                                                                                                                                                                                                                                                                                                                                                                                                                                                                                                                                                                                                                             |                                                           |
|----------------------------------------------------------------|-------------------------------------------------------------------------------------------------------------------------------------------------------------------------------------------------------------------------------------------------------------------------------------------------------------------------------------------------------------------------------------------------------------------------------------------------------------------------------------------------------------------------------------------------------------------------------------------------------------------------------------------------------------------------------------------------------------------------------------------------------------------------------------------------------------------------------------------------------------------------------------------------------------|-----------------------------------------------------------|
| Specialty substance use disorder treatment facility            | <p>We'd like to know whether your largest ACO contract (as measured by total attributed members) includes any specialty substance use treatment providers. Please identify whether the following facilities are participating in your largest ACO contract:</p> <p><u>Outpatient Services</u><br/> SAMHSA certified narcotic treatment program that provides methadone (Opioid Treatment Program (OTP))<br/> Other outpatient substance use treatment program (Not SAMHSA certified narcotic treatment program/OTP)<br/> Bridge clinic, or similar addiction clinic that provides substance use treatment for patients recently discharged from hospital or ED who are not yet connected to residential or other outpatient substance use treatment</p> <p><u>Inpatient</u><br/> Inpatient substance use treatment facility</p> <p><u>Residential</u><br/> Residential substance use treatment facility</p> | Yes<br>No                                                 |
| Patient registry to identify patients with opioid use disorder | <p>We are interested in how clinicians in your organization identify patients with Opioid Use Disorder (OUD). How often do clinicians in your organization use the following strategies to identify patients with OUD?</p> <p>Patient dashboard or registry</p>                                                                                                                                                                                                                                                                                                                                                                                                                                                                                                                                                                                                                                             | Never<br>Sometimes<br>Most of the time<br>All of the time |
| Patient registry to track mental health symptoms               | <p>Do clinicians in your organization use the following strategies to identify and monitor mental illness among your patients with OUD?</p> <p>Patient registry to track mental health symptoms and treatment response</p>                                                                                                                                                                                                                                                                                                                                                                                                                                                                                                                                                                                                                                                                                  |                                                           |
| <b>Accountable Care Organization characteristics</b>           |                                                                                                                                                                                                                                                                                                                                                                                                                                                                                                                                                                                                                                                                                                                                                                                                                                                                                                             |                                                           |
| Organization type                                              | <p>Is your organization a:</p> <p>Hospital<br/> Health system (includes hospital(s) and medical practices)<br/> Medical group (includes medical practices)<br/> Safety-net provider (e.g., FQHC or coalition)<br/> Other (fill in)</p>                                                                                                                                                                                                                                                                                                                                                                                                                                                                                                                                                                                                                                                                      | One choice                                                |
| Medicaid Accountable Care Organization contract                | <p>Do you currently have an ACO or ACO-like contract directly with a state Medicaid program (e.g., with a public Medicaid agency, as opposed to a managed care organization)?</p>                                                                                                                                                                                                                                                                                                                                                                                                                                                                                                                                                                                                                                                                                                                           | Yes<br>No                                                 |

|                                 |                                                                                                                                                                                                                                                                                                                           |                                                                                                                     |
|---------------------------------|---------------------------------------------------------------------------------------------------------------------------------------------------------------------------------------------------------------------------------------------------------------------------------------------------------------------------|---------------------------------------------------------------------------------------------------------------------|
|                                 | Do you currently have an ACO contract with a private health plan (e.g., managed care organization) serving Medicaid enrollees?                                                                                                                                                                                            |                                                                                                                     |
| Financial barriers to treatment | <p>Fixed costs can be a barrier to providing substance use treatment and mental health services. How strongly do you agree or disagree with the following statement:</p> <p><i>Staffing, specialized training, and other costs can be a barrier to delivering mental health and substance use treatment services.</i></p> | <p>Strongly agree<br/>Somewhat agree<br/>Neither agree nor disagree<br/>Somewhat disagree<br/>Strongly disagree</p> |
| Third-party management partner  | Is your ACO affiliated with a third-party administrator or external, non-provider partner organization (e.g., management services organization or administrative services partner)?                                                                                                                                       | <p>Yes<br/>No</p>                                                                                                   |

**eTable 2.** Comparisons Between Characteristics of Respondents to the National Survey of Accountable Care Organizations and Nonrespondent Organizations in the Medicare Shared Savings Program

|                                                      | Not<br>Responded | Responded | p-value |
|------------------------------------------------------|------------------|-----------|---------|
| N                                                    | 247              | 227       |         |
| <b>Contract Characteristics (%)</b>                  |                  |           |         |
| 2-sided risk (vs. 1 sided)                           | 38.9%            | 43.4%     | 0.31    |
| High-revenue (vs. low-revenue)                       | 47.4%            | 49.6%     | 0.63    |
| Participates in ACO Investment Model                 | 1.6%             | 3.1%      | 0.29    |
| Participates in Advanced Pay                         | 1.2%             | 3.1%      | 0.16    |
| <b>Service Area (%)</b>                              |                  |           |         |
| -Northeast                                           | 27.5%            | 25.4%     | 0.61    |
| -Midwest                                             | 26.7%            | 27.2%     | 0.91    |
| -South                                               | 65.2%            | 57.0%     | 0.07    |
| -West                                                | 15.0%            | 16.7%     | 0.62    |
| -Multi-Region (not mutually exclusive of list above) | 28.7%            | 22.4%     | 0.11    |
| State with Medicaid Accountable Care Organizations   | 26.7%            | 18.9%     | 0.04    |
| <b>Attributed Beneficiary Characteristics (2021)</b> |                  |           |         |
| N (mean)                                             | 21810            | 19618     | 0.28    |
| <b>Size Quartile (number beneficiaries)</b>          |                  |           |         |
| -1st quartile (2938-8205)                            | 27.5%            | 22.4%     | 0.20    |
| -2nd quartile (7261-12991)                           | 22.3%            | 28.1%     | 0.15    |
| -3rd quartile (13136-23732)                          | 23.9%            | 26.3%     | 0.54    |
| -4th quartile (23853-214009)                         | 26.3%            | 23.2%     | 0.44    |
| Dual-Eligible (%)                                    | 13               | 13        | 0.47    |
| Disabled (%)                                         | 9.5%             | 10.4%     | 0.11    |
| <b>Race/Ethnicity (%)</b>                            |                  |           |         |
| -White                                               | 87.4%            | 86.8%     | 0.64    |
| -Black                                               | 7.9%             | 8.2%      | 0.65    |
| -Asian                                               | 2.0%             | 1.9%      | 0.95    |
| -Native                                              | 0.2%             | 0.2%      | 0.34    |
| -Other                                               | 3.7%             | 4.0%      | 0.22    |
| -Hispanic                                            | 1.7%             | 1.6%      | 0.88    |
| <b>Age (%)</b>                                       |                  |           |         |
| -Under 65                                            | 11.8%            | 12.8%     | 0.09    |
| -65-74                                               | 48.2%            | 48.3%     | 0.81    |
| -75-84                                               | 30.5%            | 29.8%     | 0.03    |
| -85 plus                                             | 12.3%            | 11.9%     | 0.29    |

### Providers in Contract

|                                          |       |       |      |
|------------------------------------------|-------|-------|------|
| Any Federally Qualified Health Centers   | 23.5% | 23.7% | 0.96 |
| Any Critical Access Hospitals            | 22.3% | 18.0% | 0.25 |
| Any Rural Health Clinics                 | 34.8% | 31.1% | 0.40 |
| Any Elected Teaching Amendment Hospitals | 0.0%  | 0.4%  | 0.30 |
| Primary Care Providers (mean number)     | 320   | 281   | 0.32 |
| Specialists (mean number)                | 616   | 531   | 0.35 |

### Utilization Measures

|                                                                     |       |       |      |
|---------------------------------------------------------------------|-------|-------|------|
| Inpatient discharges per 1000 beneficiary-years                     | 262   | 265   | 0.51 |
| Psych Discharges per 1000 beneficiary-years                         | 5     | 5     | 0.76 |
| Emergency department visits per 1000 beneficiary-years (outpatient) | 610   | 608   | 0.85 |
| Emergency department visits per 1000 beneficiary-years (inpatient)  | 191   | 194   | 0.55 |
| Primary Care services per 1000 beneficiary-years                    | 11013 | 10933 | 0.71 |

### Performance Measures

|                                                                                                                                     |       |       |      |
|-------------------------------------------------------------------------------------------------------------------------------------|-------|-------|------|
| Consumer Assessment of Healthcare Providers and Systems (CAHPS)                                                                     |       |       |      |
| -CAHPS: Getting timely care                                                                                                         | 84.6% | 84.8% | 0.55 |
| -CAHPS: How well your providers communicate                                                                                         | 93.4% | 93.7% | 0.02 |
| -CAHPS: Patients Rating of Provider                                                                                                 | 92.0% | 92.4% | 0.01 |
| -CAHPS: Access to Specialists                                                                                                       | 78.7% | 78.9% | 0.51 |
| -CAHPS: Health Promotion and Education                                                                                              | 61.4% | 61.8% | 0.35 |
| -CAHPS: Shared Decision Making                                                                                                      | 60.6% | 61.2% | 0.10 |
| -CAHPS: Health Status/Functional Status                                                                                             | 71.8% | 71.8% | 0.87 |
| -CAHPS: Stewardship of Patient Resources                                                                                            | 24.6% | 24.8% | 0.72 |
| -CAHPS: Courteous and Helpful Office Staff                                                                                          | 91.9% | 91.9% | 0.92 |
| -CAHPS: Care Coordination                                                                                                           | 85.5% | 85.8% | 0.24 |
| Percent of beneficiaries with hospital 30-day readmission                                                                           | 0.2%  | 0.2%  | 0.98 |
| Rate of risk-adjusted all-cause Unplanned Admissions for patients with multiple chronic conditions                                  | 33.9  | 34.1  | 0.58 |
| Percent of beneficiaries screened for future fall risk                                                                              | 87.3% | 86.8% | 0.66 |
| Percent of beneficiaries who received a flu shot                                                                                    | 80.8% | 80.2% | 0.50 |
| Percent of beneficiaries screened for tobacco use and received cessation intervention if identified as a user                       | 81.5% | 80.4% | 0.46 |
| Percent of beneficiaries 12+ screened for depression and received follow-up plan if positive (Web Interface)                        | 73.9% | 74.9% | 0.51 |
| Percent of beneficiaries 12+ screened for depression and received follow-up plan if positive (electronic clinical quality measures) | 43.2% | 62.7% | 0.12 |
| Percent of beneficiaries 50-75 screened for colorectal cancer                                                                       | 73.8% | 73.4% | 0.73 |
| Percent of female beneficiaries 50-74 screened for breast cancer (mammogram) in last 27 months prior to measurement period          | 75.3% | 74.9% | 0.66 |

|                                                                                                                                                |       |       |      |
|------------------------------------------------------------------------------------------------------------------------------------------------|-------|-------|------|
| Percent of beneficiaries at high risk for cardiovascular disease event who were prescribed statin therapy                                      | 84.1% | 84.4% | 0.62 |
| Percent of beneficiaries 12+ with dx of depression who reached remission at 12 months                                                          | 15.9% | 15.1% | 0.52 |
| Percent of patients 18-75 with diabetes who had a Hemoglobin A1C>9% (Web Interface)                                                            | 12.6% | 12.3% | 0.68 |
| Percent of patients 18-75 with diabetes who had a Hemoglobin A1C >9% (electronic clinical quality measures)                                    | 40.2% | 38.2% | 0.84 |
| Percent of patients 18-85 with dx of hypertension who had blood pressure that was adequately controlled (Web Interface)                        | 74.9% | 74.9% | 0.99 |
| Percent of patients 18-85 with dx of hypertension who had blood pressure that was adequately controlled (electronic clinical quality measures) | 65.0% | 73.3% | 0.06 |
| Time in Medicare Shared Savings Program Contract (years)                                                                                       | 5.5   | 5.3   | 0.47 |

Source: Medicare Shared Savings Program (MSSP) Accountable Care Organization Participant list, MSSP 2021 Performance Year Financial and Quality Results. P-values come from f-tests value in a linear model predicting response status (1=responded, 0=not responded) using the independent characteristic of interest.



**eTable 3.** The Association Between Substance Use Disorder Treatment Resources and Adoption of Digital Health Technologies for Opioid Use Disorder in Accountable Care Organizations

|                                                                       | Any technology category used (1-3 total) | Remote mental health therapy and tracking | Virtual peer recovery support programs | Digital recovery support for adjuvant cognitive behavioral therapy |
|-----------------------------------------------------------------------|------------------------------------------|-------------------------------------------|----------------------------------------|--------------------------------------------------------------------|
|                                                                       | Average marginal effect (standard error) |                                           |                                        |                                                                    |
| <b>Substance use disorder treatment resources</b>                     |                                          |                                           |                                        |                                                                    |
| Addiction medicine specialist                                         | 39.6*** (8.5)                            | 38.9*** (8.2)                             | 22.8** (7.3)                           | 9.3 (6.7)                                                          |
| Sufficient staff to treat substance use disorders                     | 8.6 (8.9)                                | 1.6 (7.1)                                 | 14.7 (8.4)                             | 4.5 (6.1)                                                          |
| Specialty substance use disorder treatment facility                   | 1.2 (7.6)                                | -5.2 (7.2)                                | 4.6 (6.6)                              | 8.7 (5.8)                                                          |
| Medications for opioid use disorder                                   | -2.0 (7.6)                               | -3.6 (7.0)                                | -1.0 (8.5)                             | 5.8 (4.9)                                                          |
| Registry to identify patients with opioid use disorder                | -5.1 (6.9)                               | 0.3 (7.3)                                 | 6.7 (7.5)                              | -3.6 (7.3)                                                         |
| Registry to track mental health for patients with opioid use disorder | 32.2*** (7.3)                            | 33.2*** (7.1)                             | 9.3 (6.9)                              | 13.6* (6.3)                                                        |
| <b>Accountable Care Organization characteristics</b>                  |                                          |                                           |                                        |                                                                    |
| Organization type                                                     |                                          |                                           |                                        |                                                                    |
| Reference organization type                                           |                                          |                                           |                                        |                                                                    |
| Hospital or health system                                             |                                          |                                           |                                        |                                                                    |
| Physician/medical group-led                                           | 14.5 (7.5)                               | 13.8 (7.3)                                | 4.5 (9.3)                              | 17.9* (8.3)                                                        |
| Safety-net provider                                                   | 9.1 (11.6)                               | -20.1** (6.9)                             | 17.9 (11.7)                            | 6.8 (9.1)                                                          |
| Other                                                                 | 11.2 (9.2)                               | 14.7 (9.3)                                | -8.3 (9.1)                             | 1.3 (9.6)                                                          |
| Includes Medicaid contract                                            | 2.5 (7.2)                                | 5.8 (6.8)                                 | -0.2 (6.4)                             | -0.9 (6.3)                                                         |
| Reports financial barriers to treatment                               | -27.7** (8.9)                            | -33.2*** (9.2)                            | 15.1* (6.5)                            | 13.4** (4.3)                                                       |
| Management partnership                                                | 12.7 (7.5)                               | 13.3 (7.3)                                | 1.4 (7.4)                              | 0.5 (6.4)                                                          |
| <b>Region</b>                                                         |                                          |                                           |                                        |                                                                    |
| Reference region                                                      |                                          |                                           |                                        |                                                                    |
| South                                                                 |                                          |                                           |                                        |                                                                    |
| Midwest                                                               | -8.6 (7.9)                               | -14.5 (7.6)                               | 1.5 (7.6)                              | 0.9 (7.2)                                                          |
| Northeast                                                             | -4.9 (8.9)                               | -1.6 (8.0)                                | -6.1 (8.6)                             | -6.9 (7.0)                                                         |
| West                                                                  | -20.6* (8.1)                             | -14.4 (8.0)                               | -8.2 (7.6)                             | -7.7 (6.2)                                                         |
| Paper survey (vs. online)                                             | 9.9 (9.7)                                | 9.2 (10.6)                                | 14.0 (9.6)                             | 3.2 (10.1)                                                         |
| Observations                                                          | 180                                      |                                           |                                        |                                                                    |

Source: 2022 National Survey of Accountable Care Organizations. Results from four multivariable logistic regressions with separate outcomes: whether the organization reported any of three categories of digital health technologies (1-3 used), remote mental health therapy and tracking, virtual peer recovery support programs, and digital recovery support for adjuvant cognitive behavioral therapy. Average marginal effects were calculated to represent the expected average change in the probability of technology use, holding other variables at their observed values. Analytic weights were applied to 26 organizations with more than one respondent so that each organization had equal weight in all estimates, and clustered standard errors at the organization level accounted for correlation of responses within an organization. \*\*\*P<0.001; \*\*P<0.01; \*P<0.05
