# Supplementary material for: Provision of Digital Health Technologies for Opioid Use Disorder Treatment by US Health Care Organizations
Source: PubMed Central journal article supplement (PMC10352858; doi:10.1001/jamanetworkopen.2023.23741), 2023-07-17
Supplement: jamanetwopen-e2323741-s002.pdf [file jamanetwopen-e2323741-s002.pdf]

## Data Sharing Statement

Miller-Rosales. Provision of Digital Health Technologies for Opioid Use Disorder Treatment by US Health Care Organizations. *JAMA Netw Open*. Published July 17, 2023.

doi:10.1001/jamanetworkopen.2023.23741

### Data

**Data available:** No

### Additional Information

**Explanation for why data not available:** The datasets generated during the current study are not publicly available due to privacy considerations of our survey respondents, but are available from the corresponding author on reasonable request.
